# Supplementary material for: Two-year intermittent exposure of a multiwalled carbon nanotube by intratracheal instillation induces lung tumors and pleural mesotheliomas in F344 rats
Source: PubMed Central journal article supplement (PMC9118836; doi:10.1186/s12989-022-00478-7), 2022-05-19
Supplement: 12989_2022_478_MOESM1_ESM.pdf [file 12989_2022_478_MOESM1_ESM.pdf]

Table S1. The disposition of the animals in this study.

| Time                        | herd                                           |                        | Control |        | Low-dose |                 | High-dose |                  | Item                                                                         |
|-----------------------------|------------------------------------------------|------------------------|---------|--------|----------|-----------------|-----------|------------------|------------------------------------------------------------------------------|
|                             |                                                |                        | planned | actual | planned  | actual          | planned   | actual           |                                                                              |
| Interim sacrifice at wk-26  | Pathology                                      |                        | 5       | 5      | 5        | 5               | 5         | 5                | Histology, BALF                                                              |
|                             | Lung burden                                    |                        | -       | -      | 5        | 5               | 5         | 5                | Lung burden, PLF                                                             |
| Interim sacrifice at wk-52  | Pathology                                      |                        | 5       | 5      | 5        | 4 <sup>a)</sup> | 5         | 4 <sup>d)</sup>  | Histology, BALF                                                              |
|                             | Lung burden                                    |                        | -       | -      | 5        | 4 <sup>b)</sup> | 5         | 4 <sup>e)</sup>  | Lung burden, PLF                                                             |
| Terminal necropsy at wk-104 | Pathology (for the carcinogenicity assessment) | Before the termination | 30      | 5      | 30       | 7 <sup>c)</sup> | 30        | 16 <sup>f)</sup> | Histology                                                                    |
|                             |                                                | Terminal               |         | 25     |          | 22              |           | 12               | Histology (all) BALF, PLF, organ weights, Hematology (10 animals each group) |
|                             | Lung burden                                    | Terminal               | -       | -      | 5        | 5               | 5         | 5                | Lung burden, PLF                                                             |

a) One rat died during administration of the material (airway obstruction) at week 14. The lung sample was used for measuring MWCNT lung burden.

b) One rat died from unknown causes (week 60).

c) One rat died during an administration of the material (airway obstruction) at week 64.

d) One rat died during an administration of the material (airway obstruction) at week 40. The lung sample was used for measuring MWCNT lung burden.

e) One rat was cannibalized at week 44. The cause of death was undetermined. The lung sample was used for measuring MWCNT lung burden.

f) One rat died of a pituitary tumor at week 76 and conditions of his major organs were too bad to be examined. The other rat died during an administration of the material (airway obstruction) at week 76.

Table S2. Deaths prior to the termination among the animals used for the carcinogenicity test.

| Group     | Condition  | Time of death (week) | Cause of death                            |
|-----------|------------|----------------------|-------------------------------------------|
| Control   | Sacrificed | 61                   | Oligodendroglioma                         |
|           | Sacrificed | 69                   | Seminal vesicle adenoma                   |
|           | Dead       | 76                   | Large granular lymphocytic leukemia (LGL) |
|           | Sacrificed | 92                   | LGL                                       |
|           | Sacrificed | 93                   | Peritoneal mesothelioma                   |
| Low-dose  | Sacrificed | 38                   | Osteosarcoma (subcutis, hindleg)          |
|           | Dead       | 53                   | Pleural mesothelioma                      |
|           | Sacrificed | 66                   | LGL                                       |
|           | Sacrificed | 66                   | Harderian gland adenocarcinoma            |
|           | Sacrificed | 93                   | Pleural mesothelioma                      |
|           | Sacrificed | 95                   | Pituitary, pars distalis, adenoma         |
|           | Sacrificed | 98                   | LGL                                       |
| High-dose | Dead       | 63                   | LGL                                       |
|           | Sacrificed | 75                   | Zymbal's gland carcinoma                  |
|           | Dead       | 76                   | Bladder dysfunction                       |
|           | Dead       | 79                   | Pituitary, pars distalis, adenoma         |
|           | Dead       | 80                   | Pleural mesothelioma                      |
|           | Sacrificed | 81                   | Pleural mesothelioma                      |
|           | Sacrificed | 81                   | Pleural mesothelioma                      |
|           | Sacrificed | 82                   | Pleural mesothelioma                      |
|           | Sacrificed | 85                   | LGL                                       |
|           | Dead       | 87                   | Pleural mesothelioma                      |
|           | Sacrificed | 89                   | LGL                                       |
|           | Sacrificed | 89                   | Hemangiosarcoma (subcutis, neck)          |
|           | Sacrificed | 93                   | Pleural mesothelioma                      |
|           | Sacrificed | 93                   | Pleural mesothelioma                      |
|           | Sacrificed | 98                   | Pituitary, pars distalis, adenoma         |
|           | Sacrificed | 100                  | LGL and/or peritoneal mesothelioma        |

Table S3. Major organs weights

| Group              | Control     | Low-dose    | High-dose   |
|--------------------|-------------|-------------|-------------|
| Numbers of animals | 10          | 10          | 10          |
| Brain (g)          | 2.21 ± 0.04 | 2.22 ± 0.05 | 2.17 ± 0.06 |
| Spleen(g)          | 1.10 ± 0.22 | 1.13 ± 0.3  | 1.04 ± 0.27 |
| Liver (g)          | 13.3 ± 0.92 | 13.1 ± 1.3  | 12.9 ± 0.78 |
| Kidneys (g)        | 2.71 ± 0.19 | 2.76 ± 0.2  | 2.66 ± 0.09 |
| Adrenals (mg)      | 45.2 ± 12   | 48.5 ± 6.3  | 46.4 ± 8.1  |

Mean ± SD

Spleen: one rat bearing LGL in the low-dose group was excluded

Table S4. Hematological analyses for rats in the terminal necropsy.

|            |                        | Control     | Low-dose            | High-dose               |
|------------|------------------------|-------------|---------------------|-------------------------|
| Item       |                        | N = 10      | N = 9 <sup>1)</sup> | N = 10                  |
| Total WBC  | (x10 <sup>2</sup> /μL) | 13.50 ± 3.5 | 12.00 ± 2.8         | 13.60 ± 4.0             |
| Neutrophil | (x10 <sup>2</sup> /μL) | 6.85 ± 1.9  | 5.23 ± 1.3          | 5.29 ± 1.7              |
| Lymphocyte | (x10 <sup>2</sup> /μL) | 6.28 ± 2.1  | 6.23 ± 1.8          | 7.42 ± 2.4              |
| Eosinophil | (x10 <sup>2</sup> /μL) | 0.10 ± 0.1  | 0.28 ± 0.2          | 0.54 ± 0.2 <sup>*</sup> |
| Monocyte   | (x10 <sup>2</sup> /μL) | 0.27 ± 0.2  | 0.26 ± 0.1          | 0.35 ± 0.3              |
| RBC        | (x10 <sup>4</sup> /μL) | 858.8 ± 130 | 902.9 ± 81          | 930.1 ± 140             |
| HGB        | (g/dL)                 | 14.1 ± 2.2  | 14.8 ± 1.2          | 15.1 ± 1.9              |
| HCT        | (%)                    | 45.9 ± 6.9  | 47.8 ± 3.9          | 49.0 ± 6.6              |
| MCV        | (fL)                   | 53.4 ± 1.0  | 53.0 ± 1.0          | 52.8 ± 1.2              |
| MCH        | (pg)                   | 16.4 ± 0.5  | 16.4 ± 0.5          | 16.3 ± 0.6              |
| MCHC       | (g/dL)                 | 30.7 ± 0.7  | 30.9 ± 0.6          | 30.8 ± 0.4              |
| PLT        | (x10 <sup>4</sup> /μL) | 74.1 ± 18.1 | 69.0 ± 9.8          | 66.3 ± 8.7              |

Mean ± SD

1) One rat bearing LGL in the low-dose group was excluded

\*Significantly different from Control (by Dunnett's test)

WBC, white blood cell count; RBC, red blood cell count; HGB, hemoglobin concentration; HCT, hematocrit level; MCV, mean corpuscular volume; MCH, mean corpuscular hemoglobin; MCHC, mean corpuscular hemoglobin concentration; PLT, platelet count

Table S5. Histological classification of all pleural mesothelioma cases found in this study.

| Group     | Animal number | Time of dissection (week) | Condition                          | Grade | Classification |
|-----------|---------------|---------------------------|------------------------------------|-------|----------------|
| Low-dose  | #L14          | 53                        | dead                               | 4     | sarcomatoid    |
|           | #L28          | 93                        | moribund sacrifice                 | 3     | sarcomatoid    |
|           | #L25          | 104                       | terminal sacrifice                 | 1     | sarcomatoid    |
|           | #L34          | 104                       | terminal sacrifice                 | 2     | biphasic       |
| High-dose | #H36          | 79                        | dead (died from a pituitary tumor) | 1     | epithelioid    |
|           | #H40          | 80                        | dead                               | 4     | sarcomatoid    |
|           | #H16          | 81                        | moribund sacrifice                 | 4     | biphasic       |
|           | #H37          | 81                        | moribund sacrifice                 | 3     | biphasic       |
|           | #H24          | 82                        | moribund sacrifice                 | 3     | sarcomatoid    |
|           | #H26          | 87                        | dead                               | 4     | sarcomatoid    |
|           | #H21          | 93                        | moribund sacrifice                 | 4     | epithelioid    |
|           | #H28          | 93                        | moribund sacrifice                 | 4     | sarcomatoid    |
|           | #H14          | 104                       | terminal sacrifice                 | 1     | epithelioid    |
|           | #H19          | 104                       | terminal sacrifice                 | 1     | biphasic       |
|           | #H31          | 104                       | terminal sacrifice                 | 1     | epithelioid    |
|           | #H38          | 104                       | terminal sacrifice                 | 1     | sarcomatoid    |

Grade; 1, focally develop without invasion; 2, disseminate to several regions; 3, distribute over the pleural cavity; 4, form huge masses (more than 10 mm in diameter/thickness)

Table S6. Incidences of other tumors

| Organ system             | Neoplasm                                 | Control<br>(N=30) | Low-dose<br>(N=29) | High-dose<br>(N=28) |
|--------------------------|------------------------------------------|-------------------|--------------------|---------------------|
| Circulatory system       |                                          |                   |                    |                     |
| Heart                    | Schwannoma                               | 0                 | 1                  | 0                   |
| Hematopoietic system     |                                          |                   |                    |                     |
| Systemic                 | Large granular lymphocyte leukemia       | 4                 | 3                  | 4                   |
| Digestive system         |                                          |                   |                    |                     |
| Tongue                   | Carcinoma, squamous cell                 | 0                 | 0                  | 1                   |
| Stomach                  | Hemangioma                               | 0                 | 1                  | 0                   |
| Small intestine          | Leiomyosarcoma                           | 1                 | 0                  | 0                   |
| Reproductive system      |                                          |                   |                    |                     |
| Testis                   | Interstitial cell tumor, benign          | 26                | 24                 | 19                  |
| Prostate                 | Adenoma                                  | 2                 | 0                  | 2                   |
| Seminal vesicle          | Adenoma                                  | 1                 | 0                  | 0                   |
| Endocrine system         |                                          |                   |                    |                     |
| Pituitary gland          | Adenoma, pars distalis                   | 3                 | 5                  | 9                   |
| Thyroid gland            | Adenoma, C-cell                          | 6                 | 4                  | 2                   |
| Adrenal gland            | Pheochromocytoma, benign                 | 4                 | 2                  | 1                   |
| Pancreatic islet         | Adenoma, islet cell                      | 4                 | 3                  | 3                   |
|                          | Carcinoma, islet cell                    | 0                 | 1                  | 0                   |
| Nervous system           |                                          |                   |                    |                     |
| Brain                    | Oligodendroglioma, malignant, high grade | 1                 | 0                  | 0                   |
| Special sense system     |                                          |                   |                    |                     |
| Harderian gland          | Adenocarcinoma                           | 0                 | 1                  | 0                   |
| Ear                      | Neural crest tumor                       | 0                 | 0                  | 1                   |
| Zymbal's gland           | Carcinoma                                | 0                 | 0                  | 1                   |
| Integumentary system     |                                          |                   |                    |                     |
| Skin/Subcutaneous tissue | Fibroma                                  | 1                 | 2                  | 1                   |
|                          | Hemangiosarcoma                          | 0                 | 1                  | 1                   |
|                          | Keratoacanthoma                          | 1                 | 0                  | 1                   |
|                          | Osteosarcoma                             | 0                 | 1                  | 0                   |
| Tail                     | Keratoacanthoma                          | 0                 | 1                  | 0                   |
| Body cavity              |                                          |                   |                    |                     |
| Peritonium               | Mesothelioma, malignant                  | 1                 | 1                  | 1                   |
|                          | Lipoma                                   | 1                 | 0                  | 0                   |

Values show the number of animals with tumors

Table S7. Amounts of MWCNT in the lung and PLF

|      |                                   | week 26            | week 52            | week 104           |
|------|-----------------------------------|--------------------|--------------------|--------------------|
| Lung | Low-dose (µg/Lung)                | 147.1              | 244.4              | 920.5              |
|      | (µg/g Lung)                       | 123.8              | 166.6              | 476.8              |
|      | High-dose (µg/Lung)               | 728.5              | 1364.3             | 3615.4             |
|      | (µg/g Lung)                       | 460.3              | 690.3              | 1242.0             |
| PLF  | Low-dose (fibers/pleural cavity)  | $2.70 \times 10^4$ | $4.02 \times 10^4$ | $1.56 \times 10^5$ |
|      | High-dose (fibers/pleural cavity) | $8.89 \times 10^4$ | $2.82 \times 10^5$ | $1.11 \times 10^6$ |

Mean value (N = 4-5)

Table S8. Mean doses for each administration

|      | Low-dose group | High-dose group | Cumulative dose     |           |
|------|----------------|-----------------|---------------------|-----------|
|      | 0.125 mg/kg bw | 0.5 mg/kg bw    | Low-dose            | High-dose |
|      | (µg/lung)      | (µg/lung)       | (µg/lung)           |           |
| 1st  | 26 ± 1.4       | 103 ± 6.3       |                     |           |
| 2nd  | 33 ± 1.7       | 134 ± 7.4       |                     |           |
| 3rd  | 37 ± 1.8       | 151 ± 7.6       |                     |           |
| 4th  | 40 ± 2.0       | 162 ± 8.4       |                     |           |
| 5th  | 42 ± 2.1       | 167 ± 9.2       |                     |           |
| 6th  | 43 ± 2.2       | 171 ± 10        |                     |           |
| 7th  | 44 ± 2.5       | 176 ± 9.5       | Subtotal at week 26 | 265       |
| 8th  | 46 ± 2.6       | 181 ± 10        |                     |           |
| 9th  | 47 ± 2.9       | 186 ± 11        |                     |           |
| 10th | 47 ± 2.9       | 188 ± 10        |                     |           |
| 11th | 49 ± 2.8       | 191 ± 11        |                     |           |
| 12th | 49 ± 3.0       | 193 ± 10        |                     |           |
| 13th | 50 ± 3.0       | 196 ± 11        | Subtotal at week 52 | 552       |
| 14th | 50 ± 3.4       | 195 ± 9.1       |                     |           |
| 15th | 51 ± 3.4       | 197 ± 10        |                     |           |
| 16th | 51 ± 3.4       | 200 ± 9.9       |                     |           |
| 17th | 51 ± 3.4       | 199 ± 10        |                     |           |
| 18th | 51 ± 3.3       | 199 ± 11        |                     |           |
| 19th | 52 ± 3.4       | 200 ± 12        |                     |           |
| 20th | 51 ± 3.3       | 200 ± 11        |                     |           |
| 21st | 52 ± 3.2       | 198 ± 12        |                     |           |
| 22nd | 51 ± 3.3       | 199 ± 12        |                     |           |
| 23rd | 51 ± 3.3       | 198 ± 12        |                     |           |
| 24th | 51 ± 3.4       | 196 ± 14        |                     |           |
| 25th | 51 ± 3.2       | 197 ± 12        |                     |           |
| 26th | 50 ± 3.3       | 196 ± 15        | Total at week 104   | 1215      |
|      |                |                 |                     | 4770      |

Left: Mean ± SD of each dose for all 26 administrations

The dose was set corresponding to the individual body weight of each animal for every administration.

Right: cumulative doses at 3-time points
